# Supplementary material
Source: ML conference proceedings conference paper supplement (https://openreview.net/forum?id=jRnGy4ZzK5)

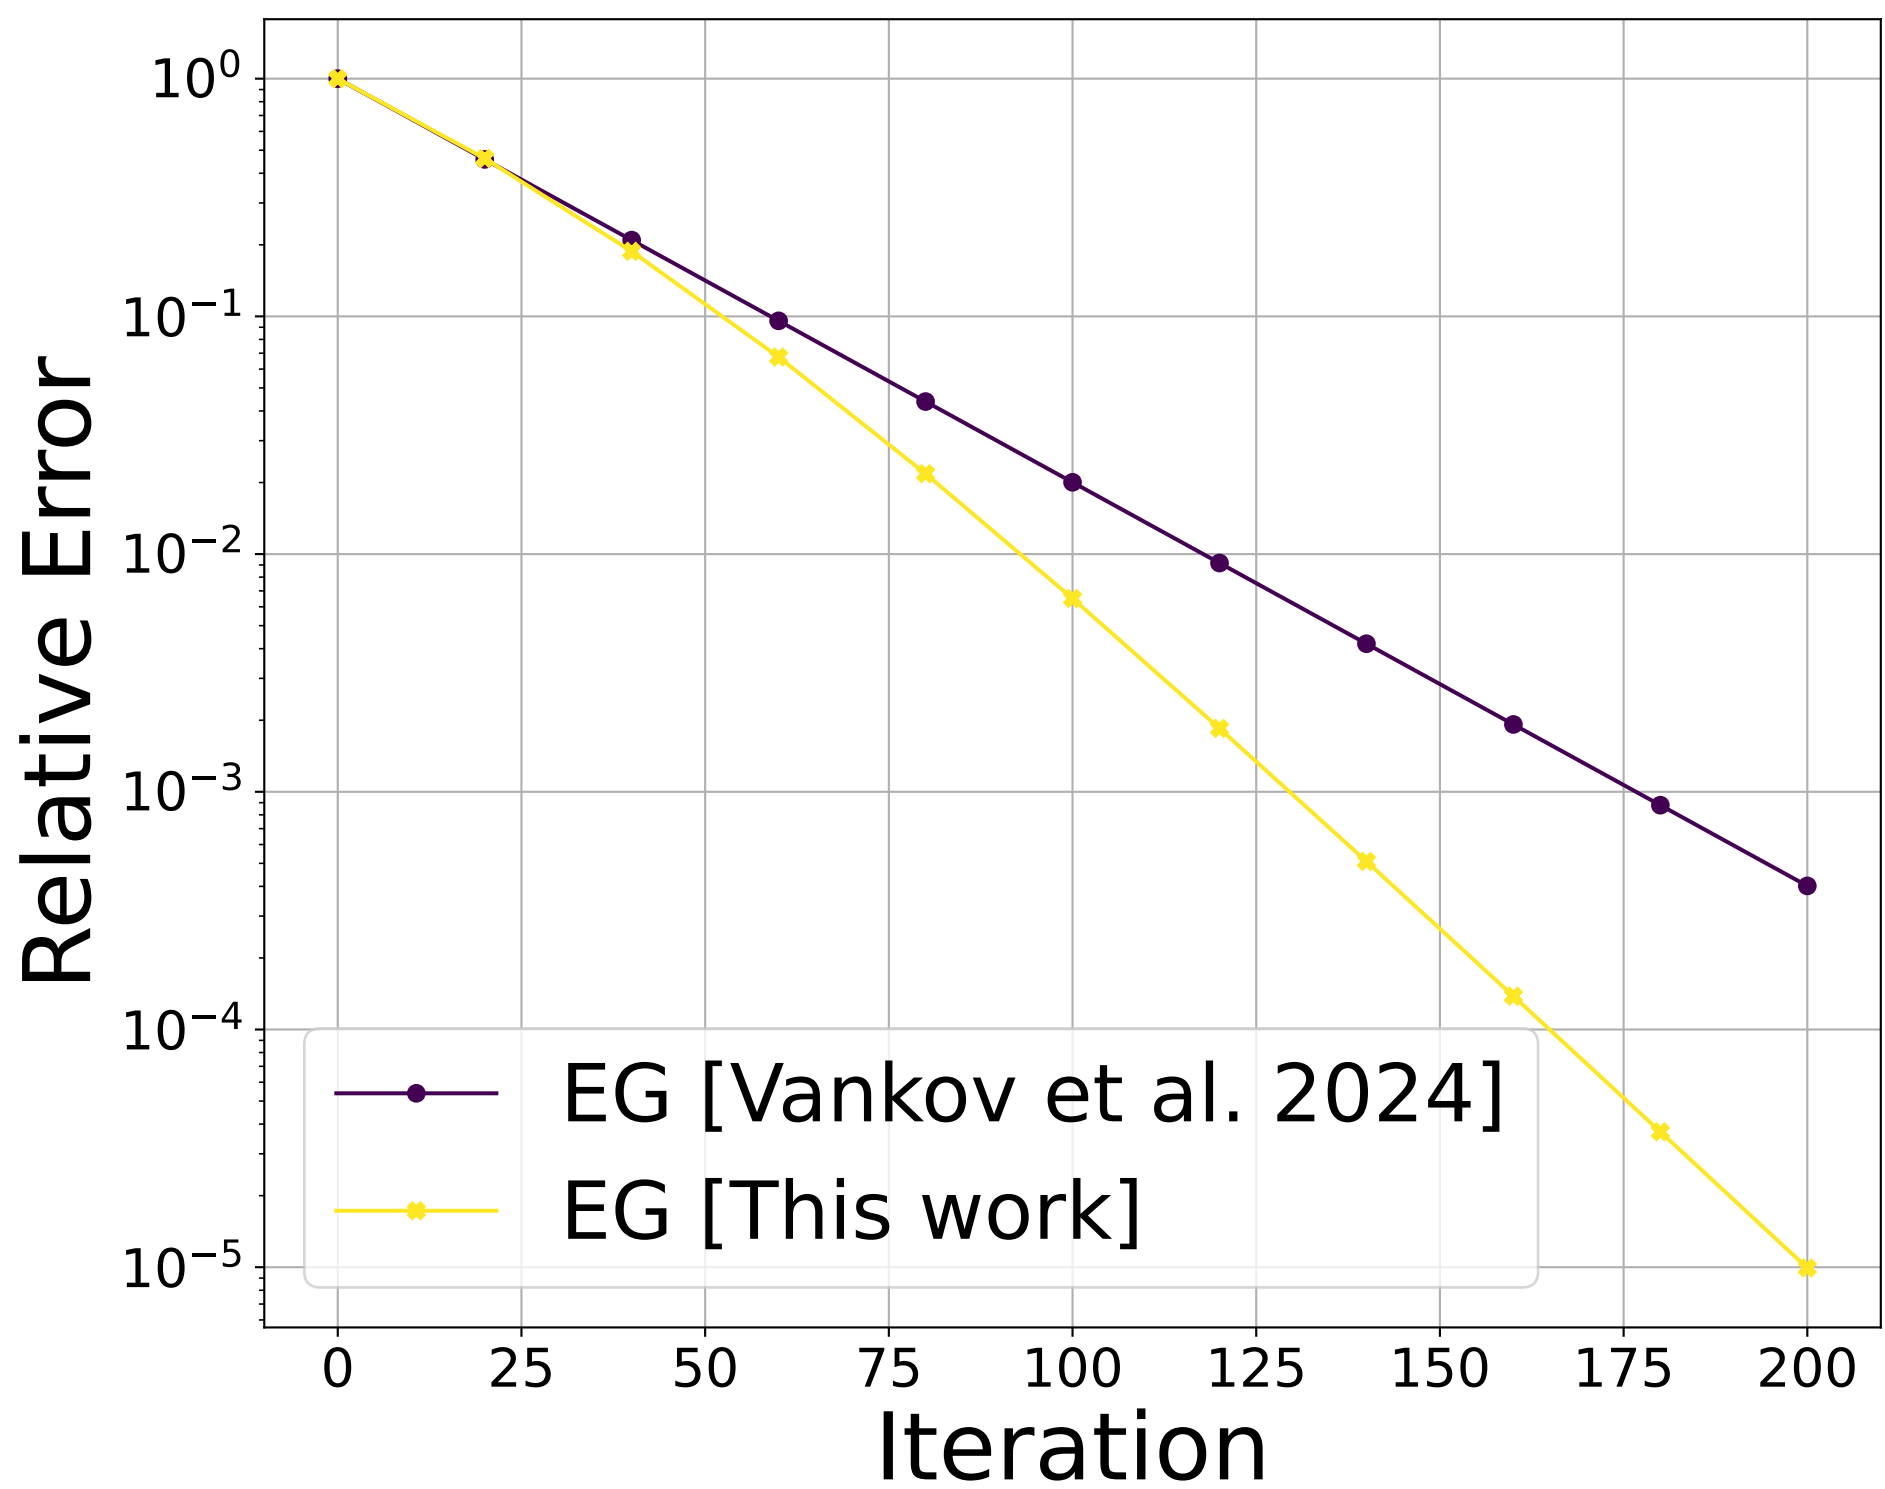

Supplement: supplementary_material [file L0L1comparison_opt_dist.pdf › L0L1_supplement_neurips25/codes/plots/L0L1comparison_opt_dist.pdf]

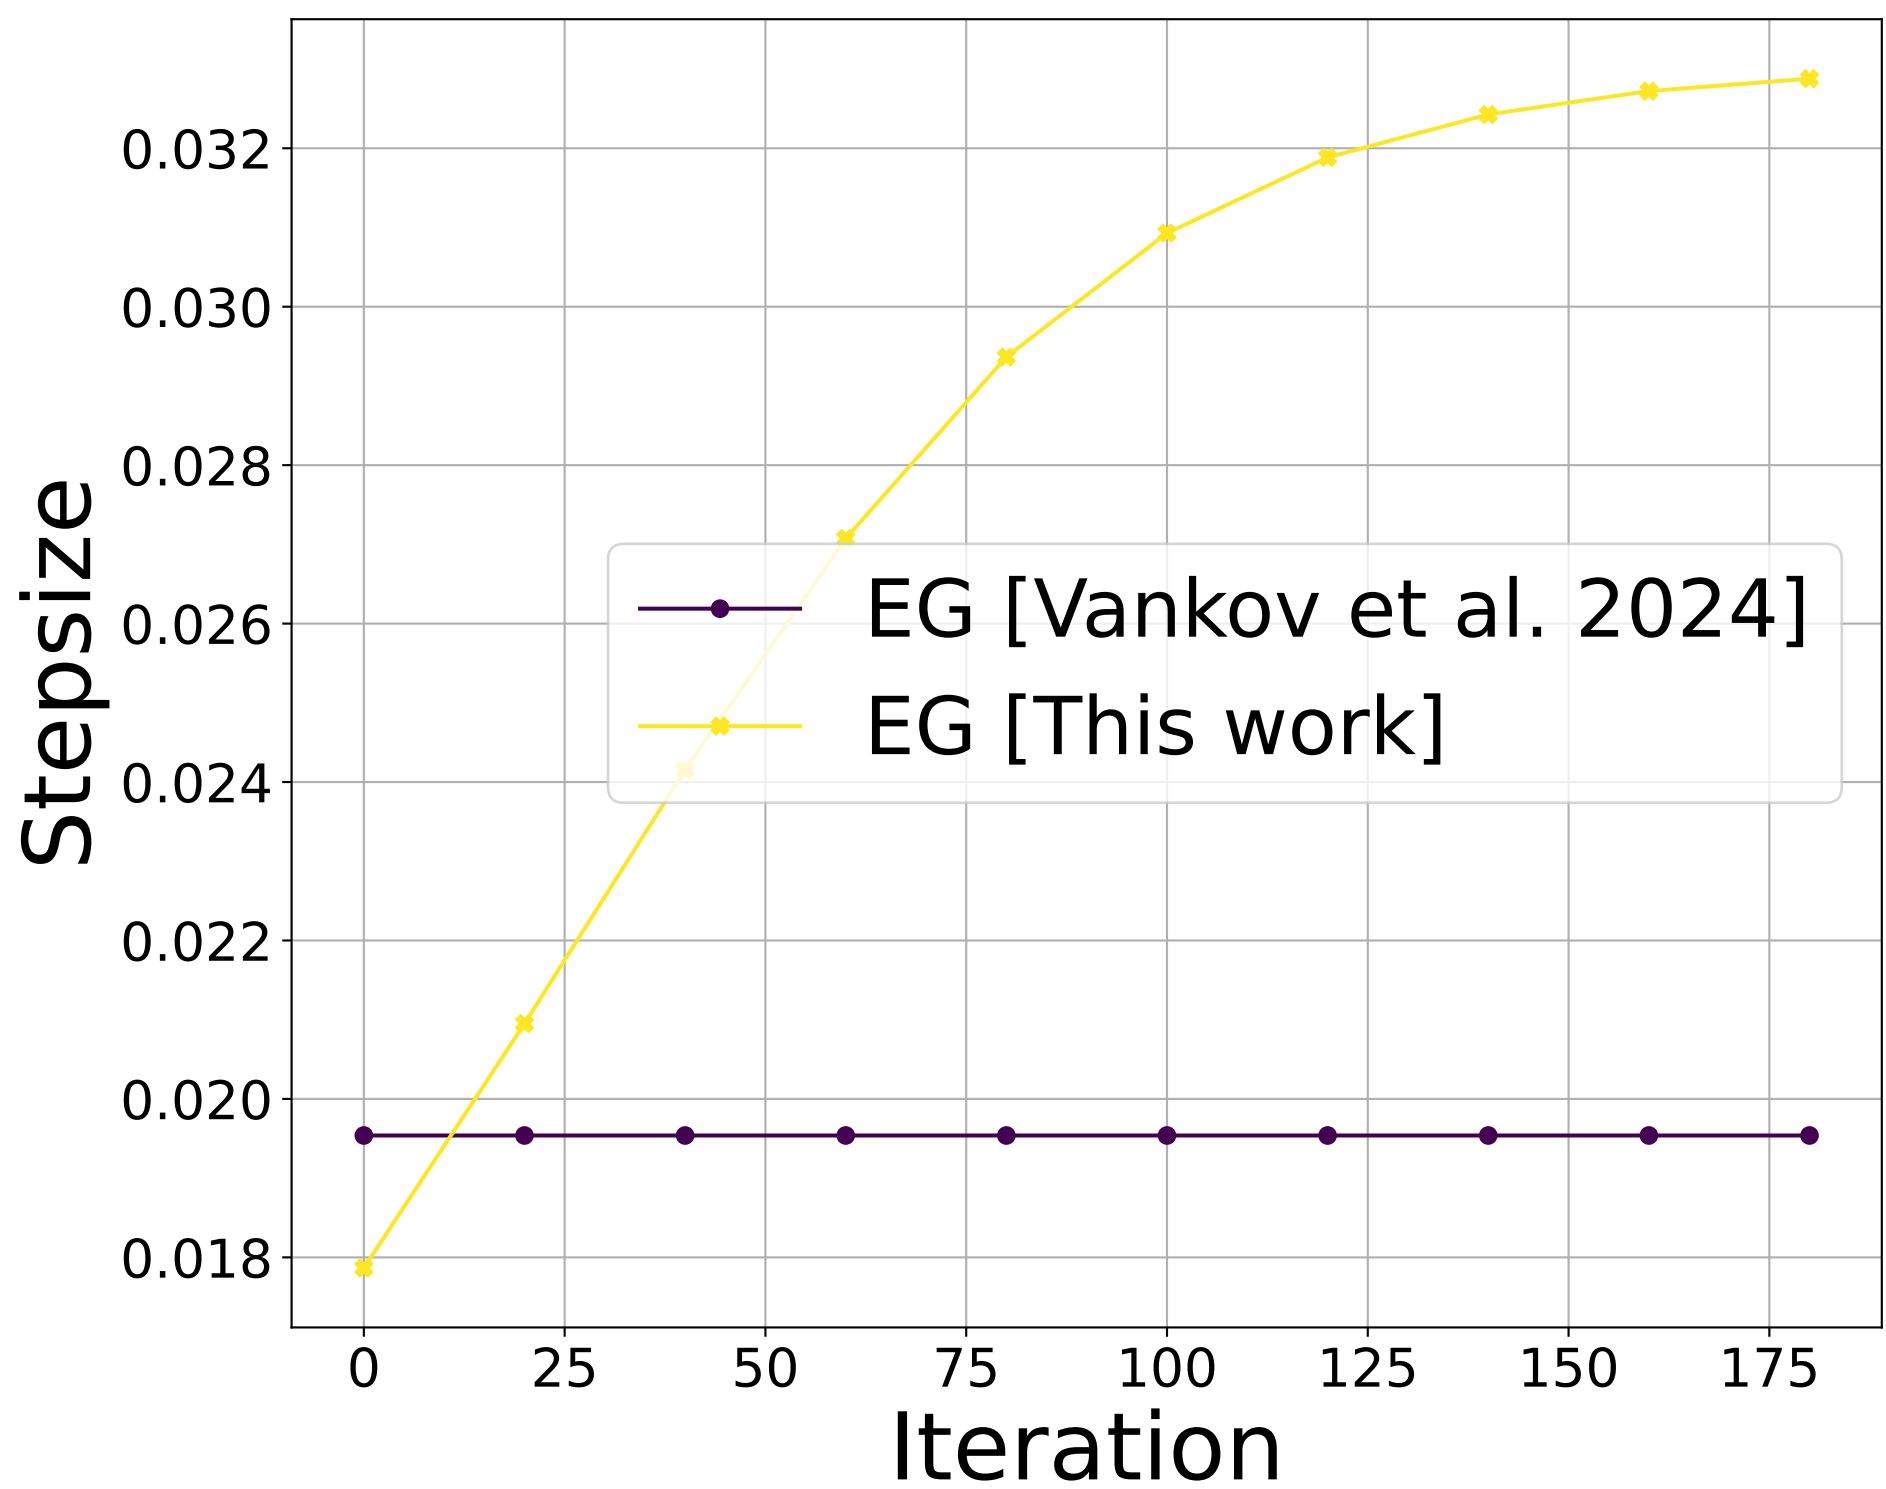

Supplement: supplementary_material [file L0L1comparison_stepsize.pdf › L0L1_supplement_neurips25/codes/plots/L0L1comparison_stepsize.pdf]

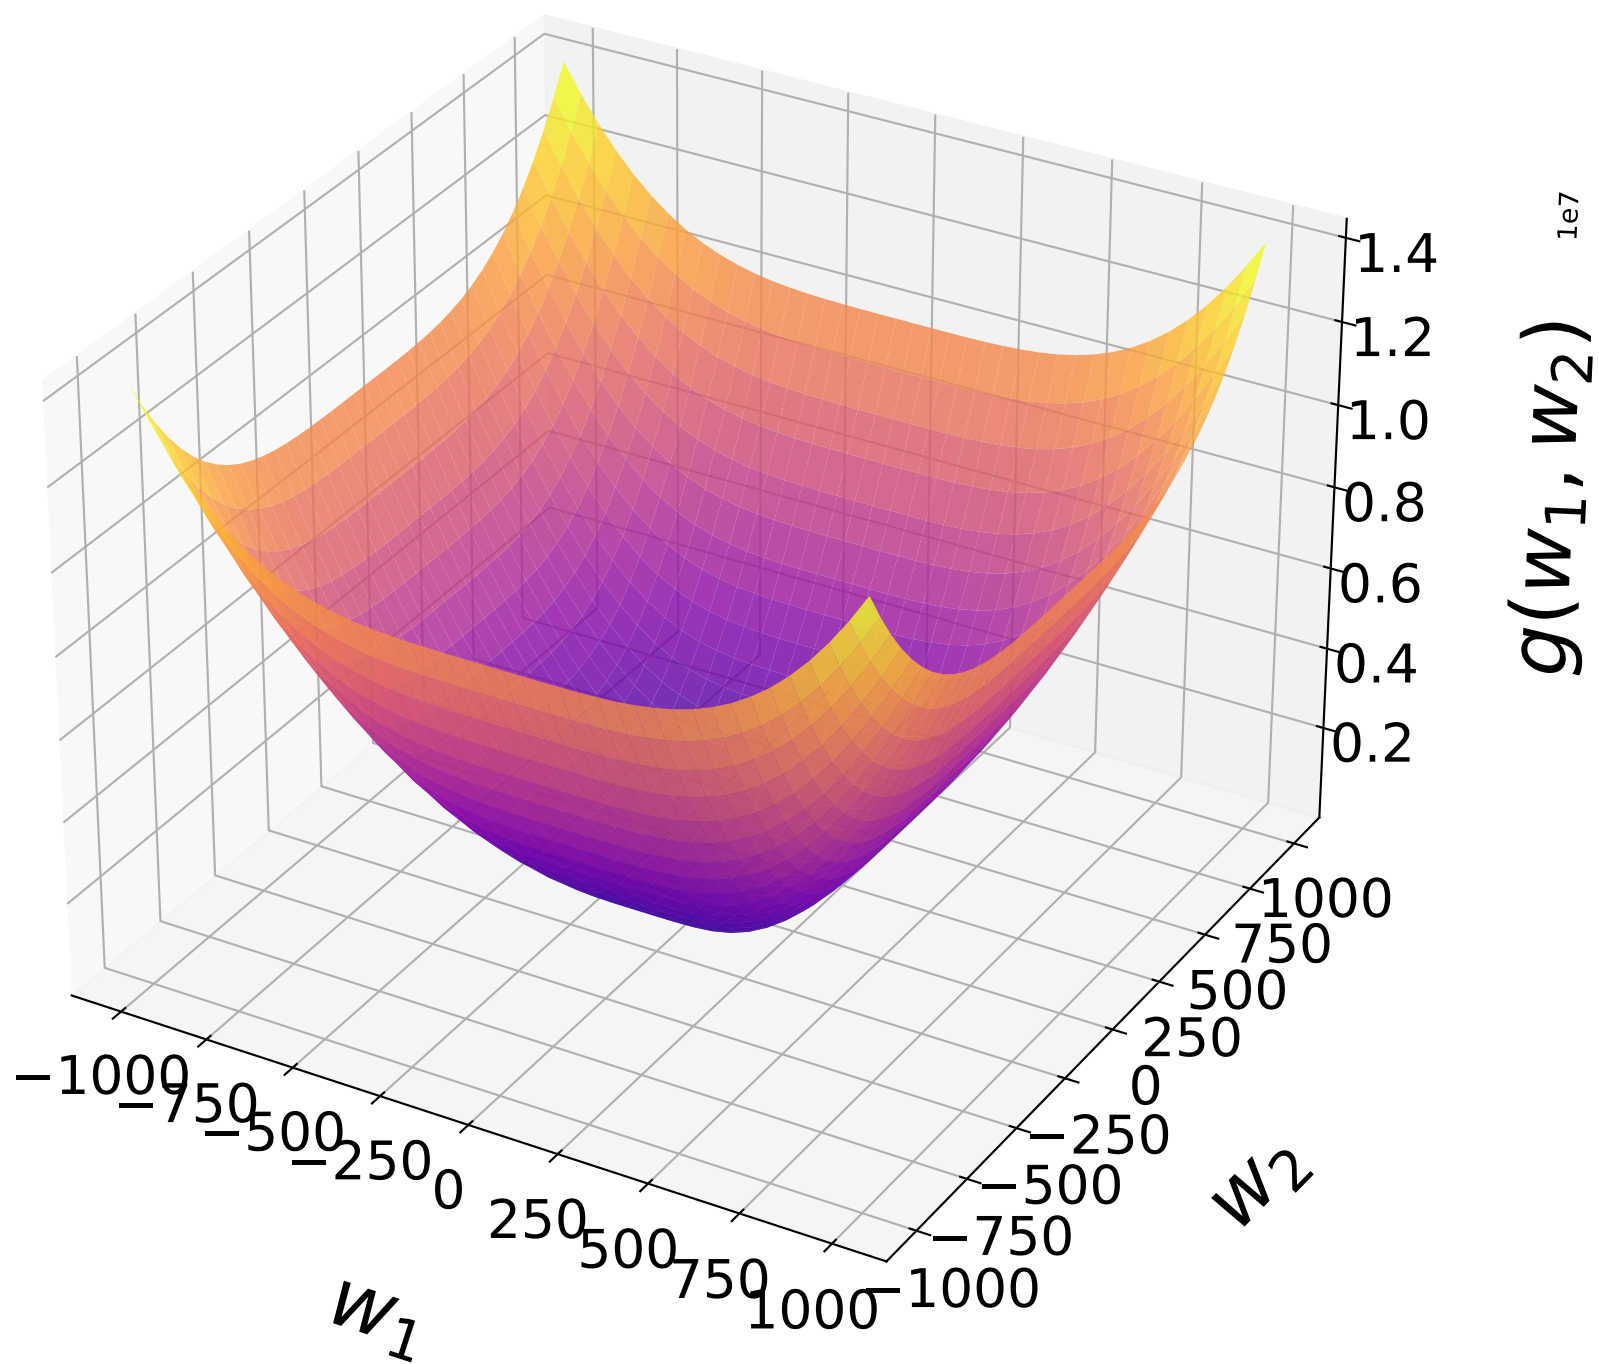

Supplement: supplementary_material [file compute_L0L1.pdf › L0L1_supplement_neurips25/codes/plots/compute_L0L1.pdf]

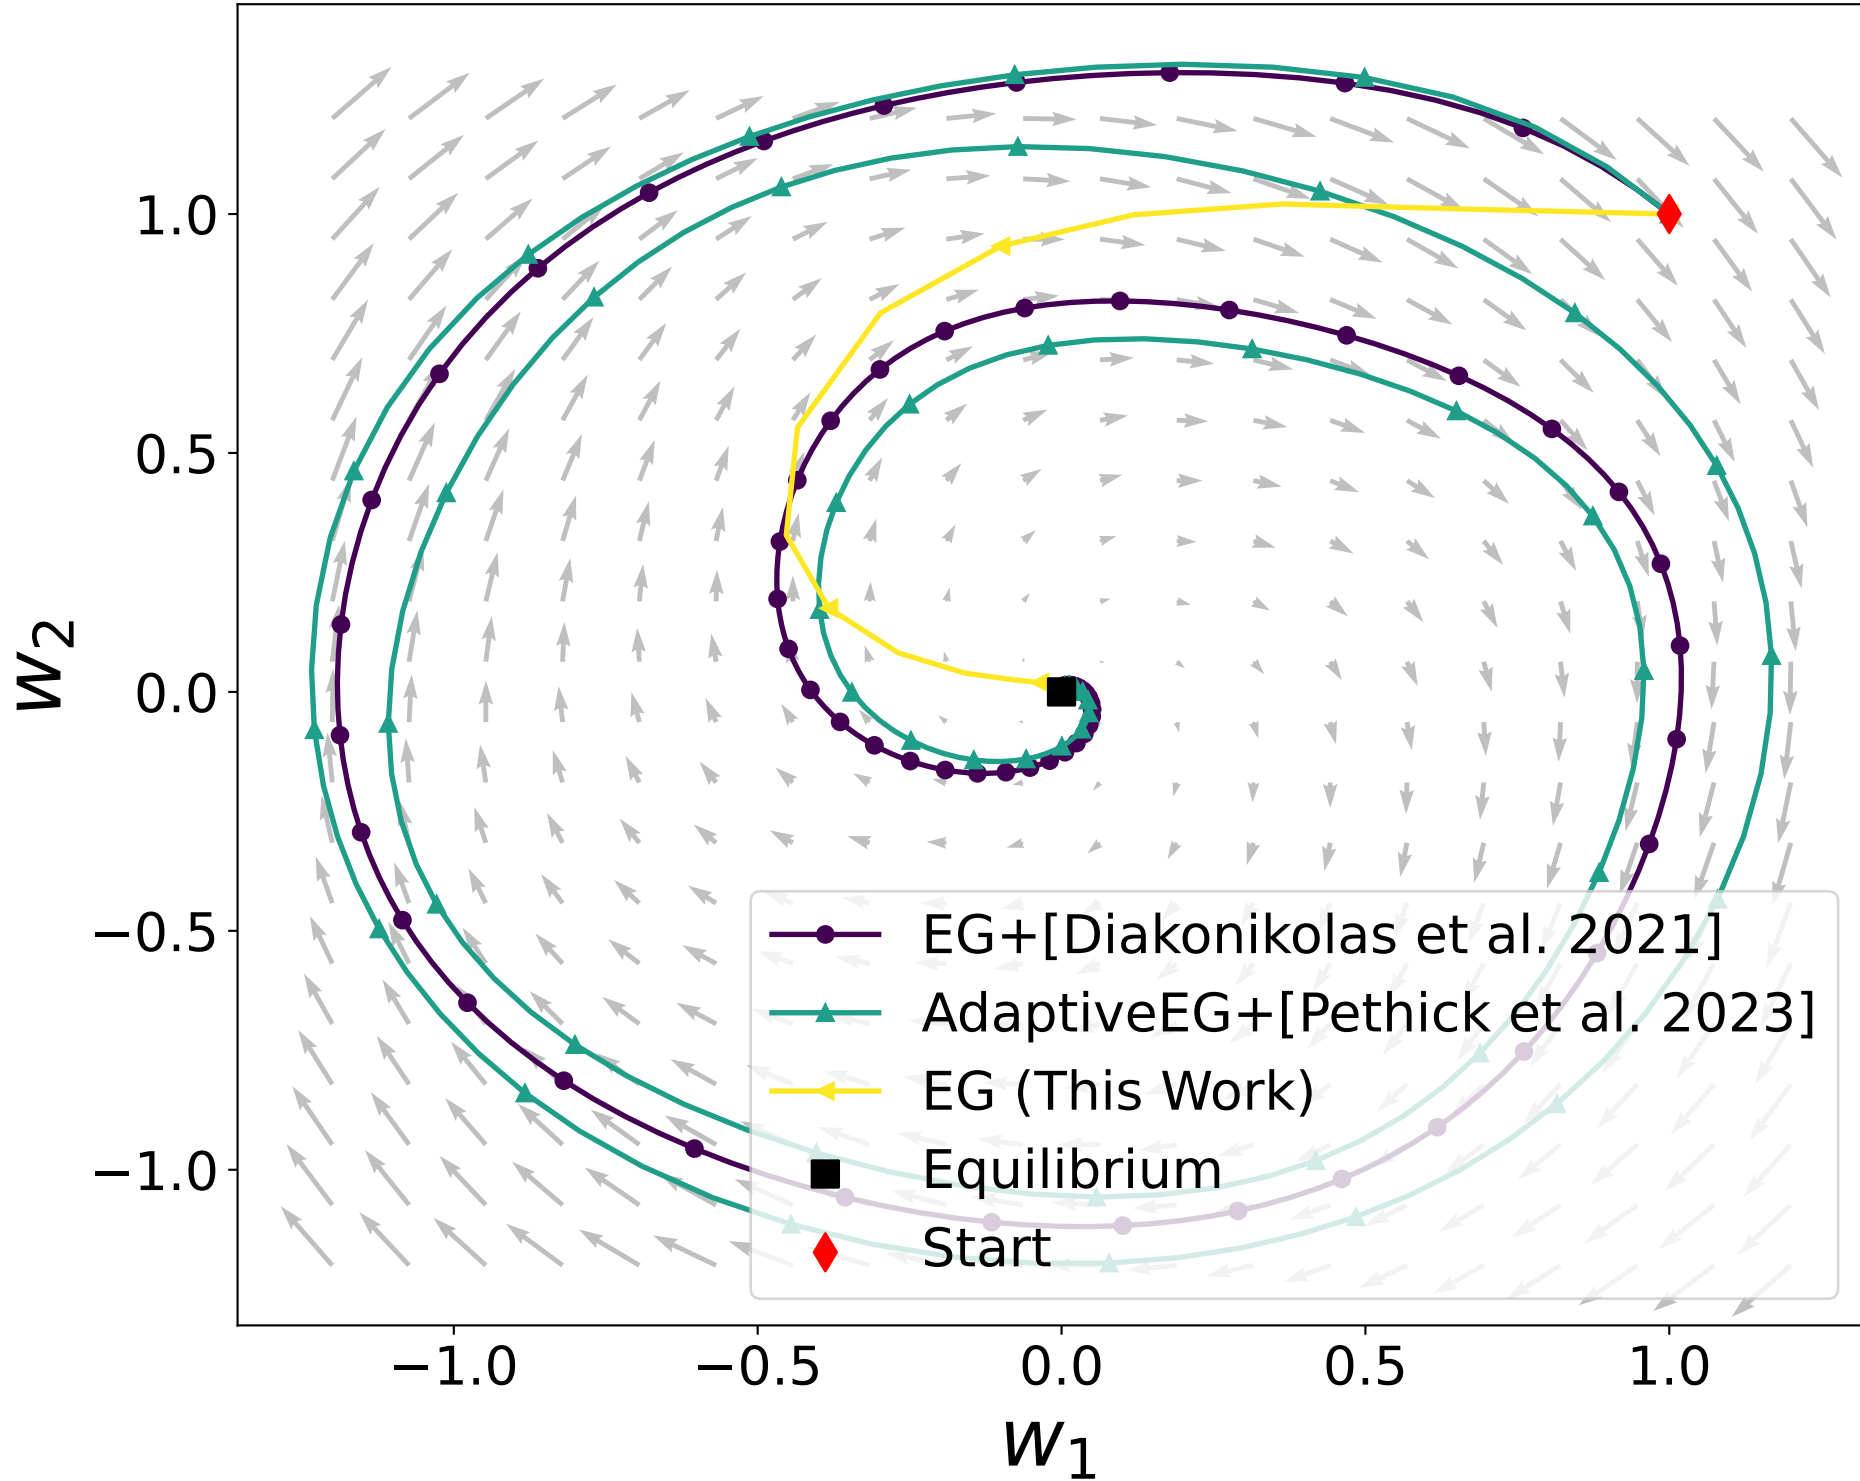

Supplement: supplementary_material [file globalforsaken.pdf › L0L1_supplement_neurips25/codes/plots/globalforsaken.pdf]

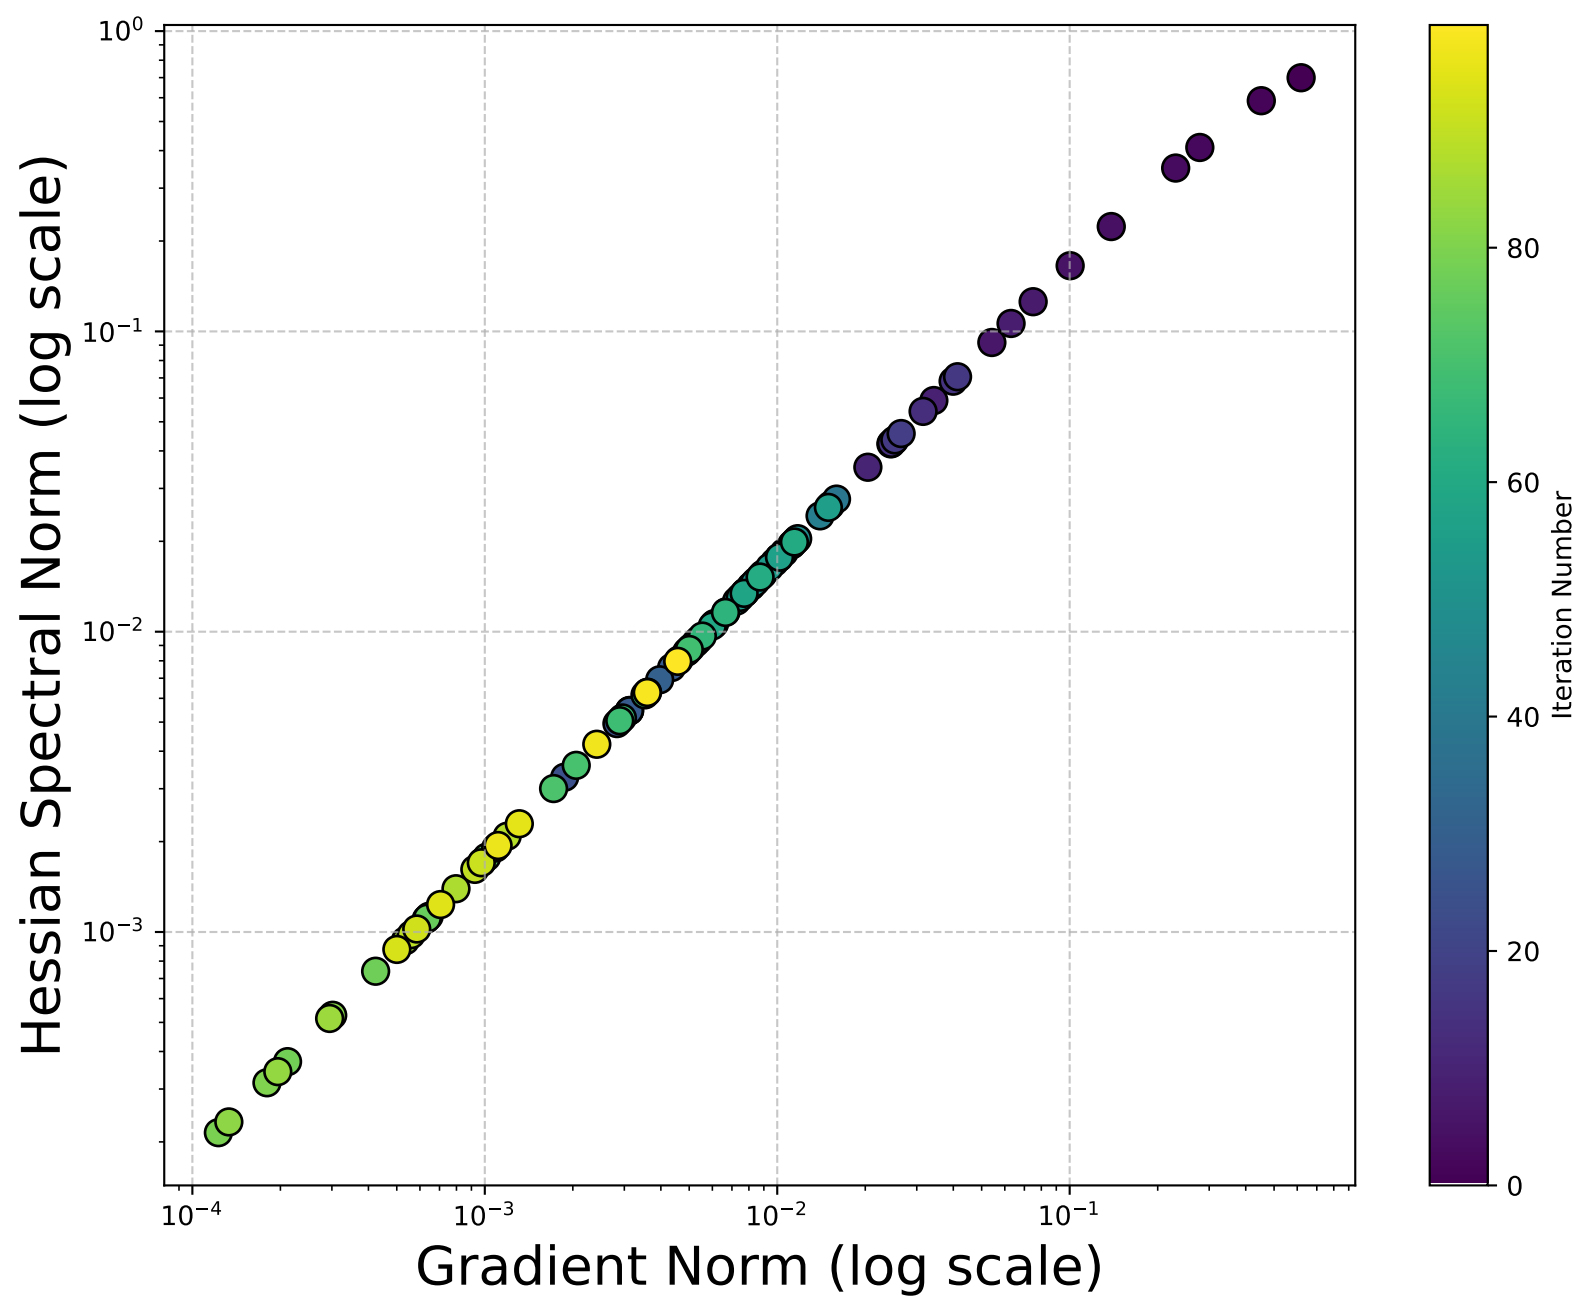

Supplement: supplementary_material [file hessian_vs_gradient_plot.pdf › L0L1_supplement_neurips25/codes/plots/hessian_vs_gradient_plot.pdf]

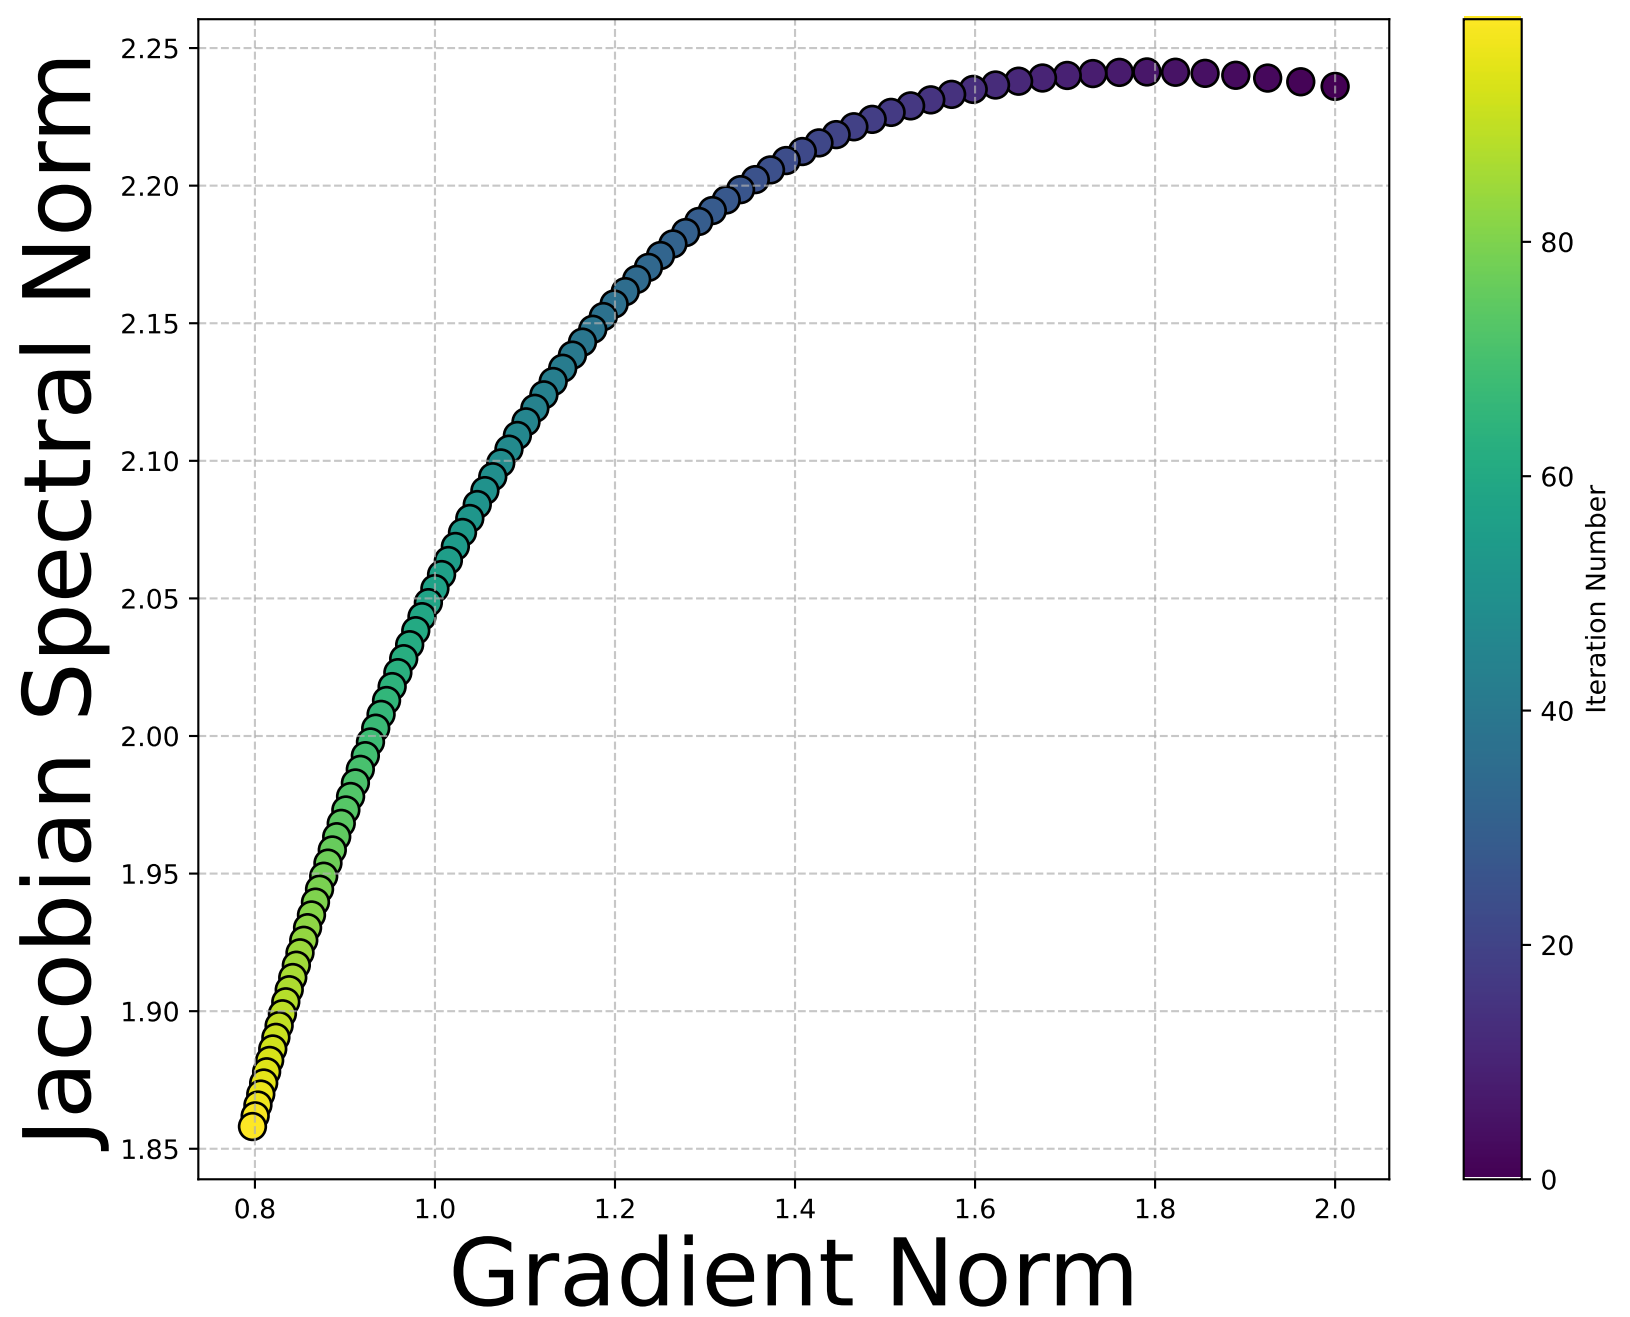

Supplement: supplementary_material [file jacobian_vs_gradient_plot.pdf › L0L1_supplement_neurips25/codes/plots/jacobian_vs_gradient_plot.pdf]

Relative Error

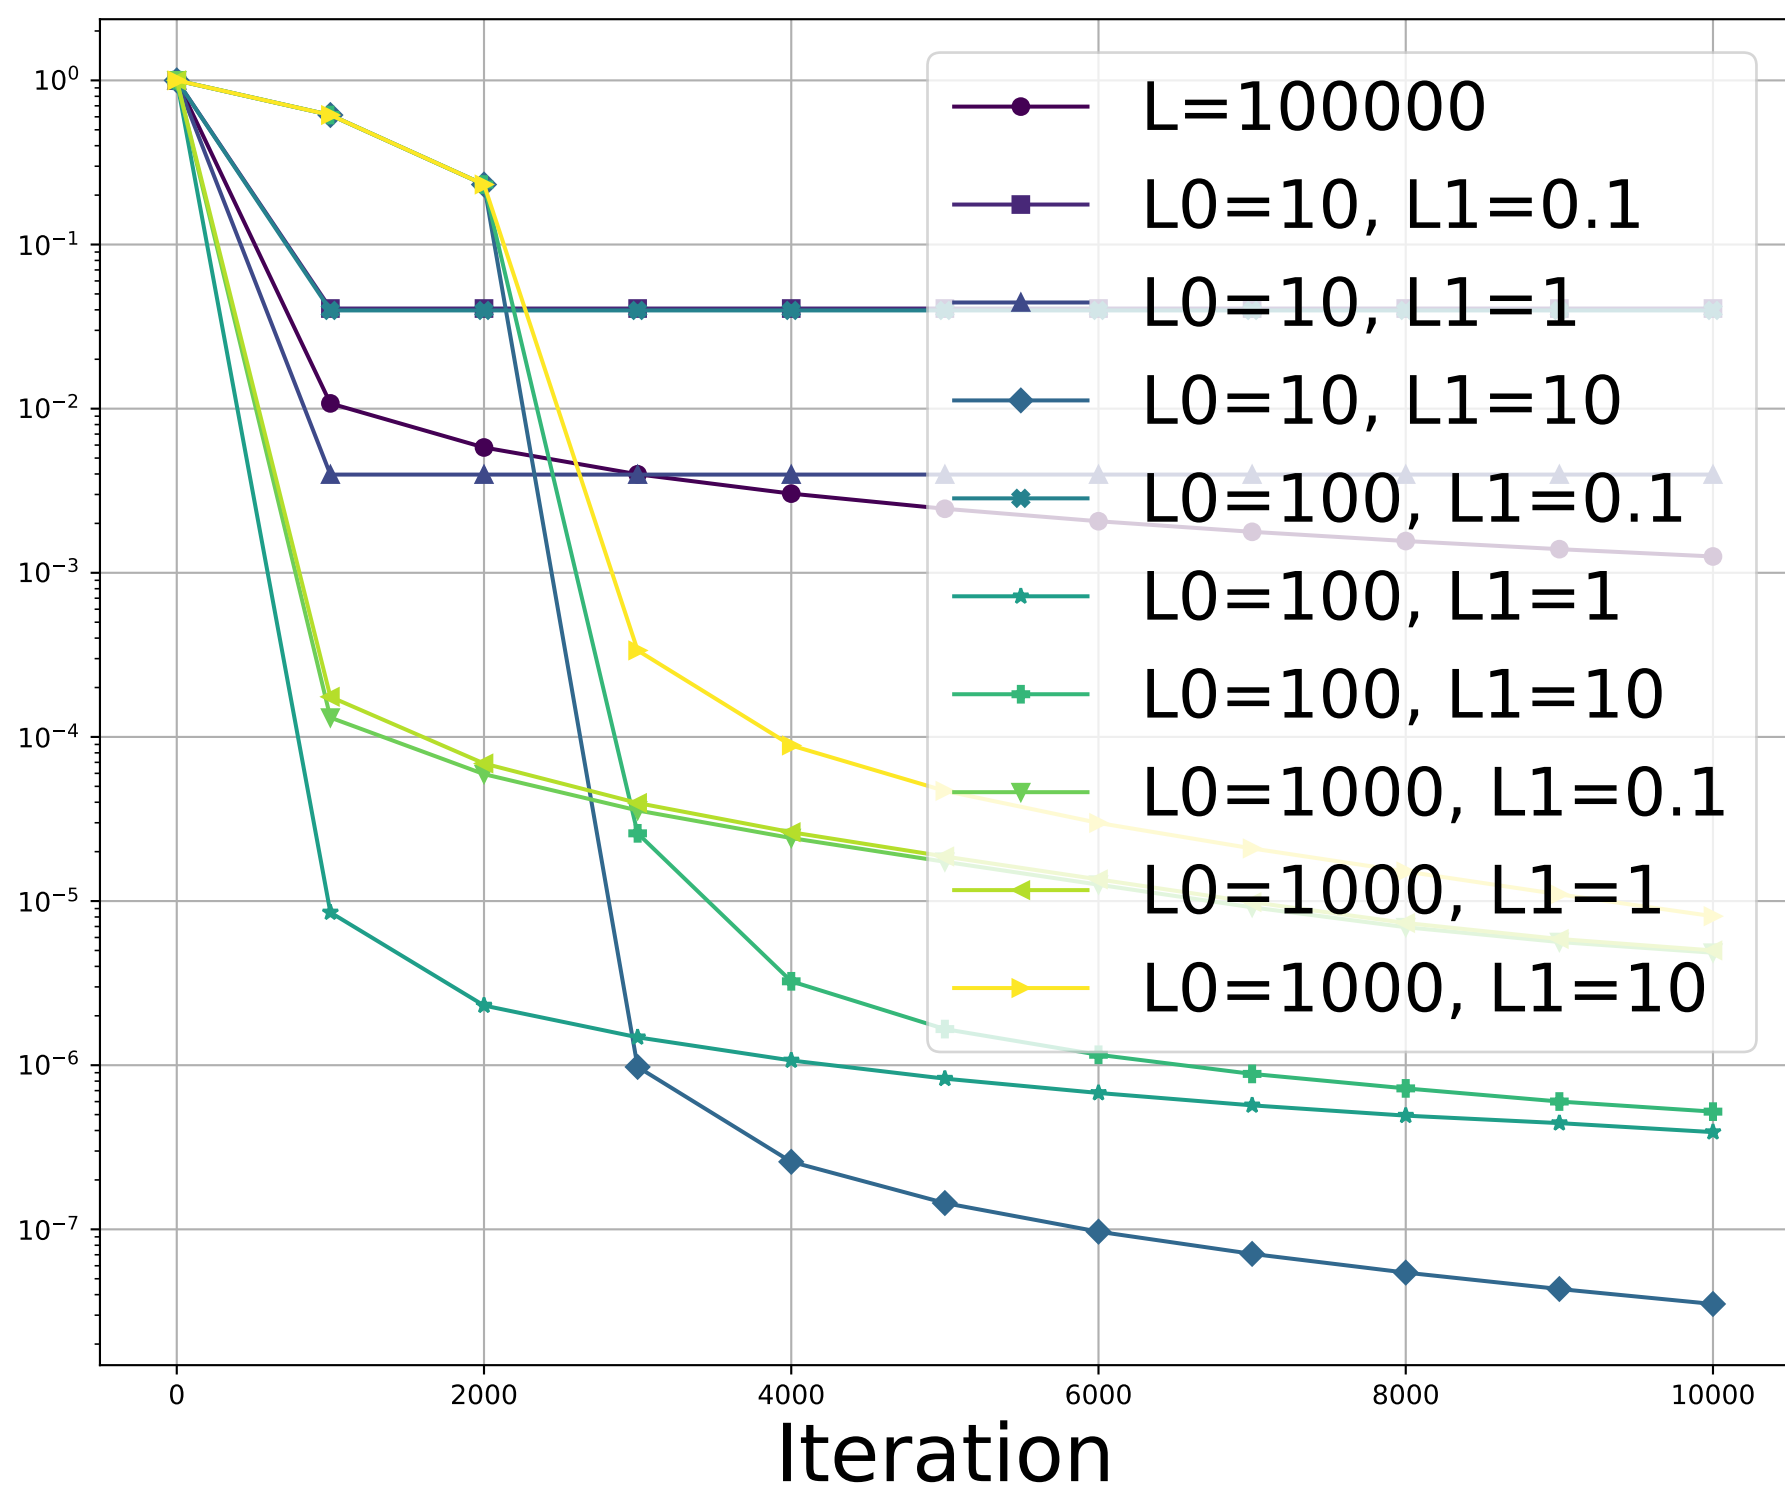

Supplement: supplementary_material [file monotone_cubic_relative_error.pdf › L0L1_supplement_neurips25/codes/plots/monotone_cubic_relative_error.pdf]

Step Size

Iteration

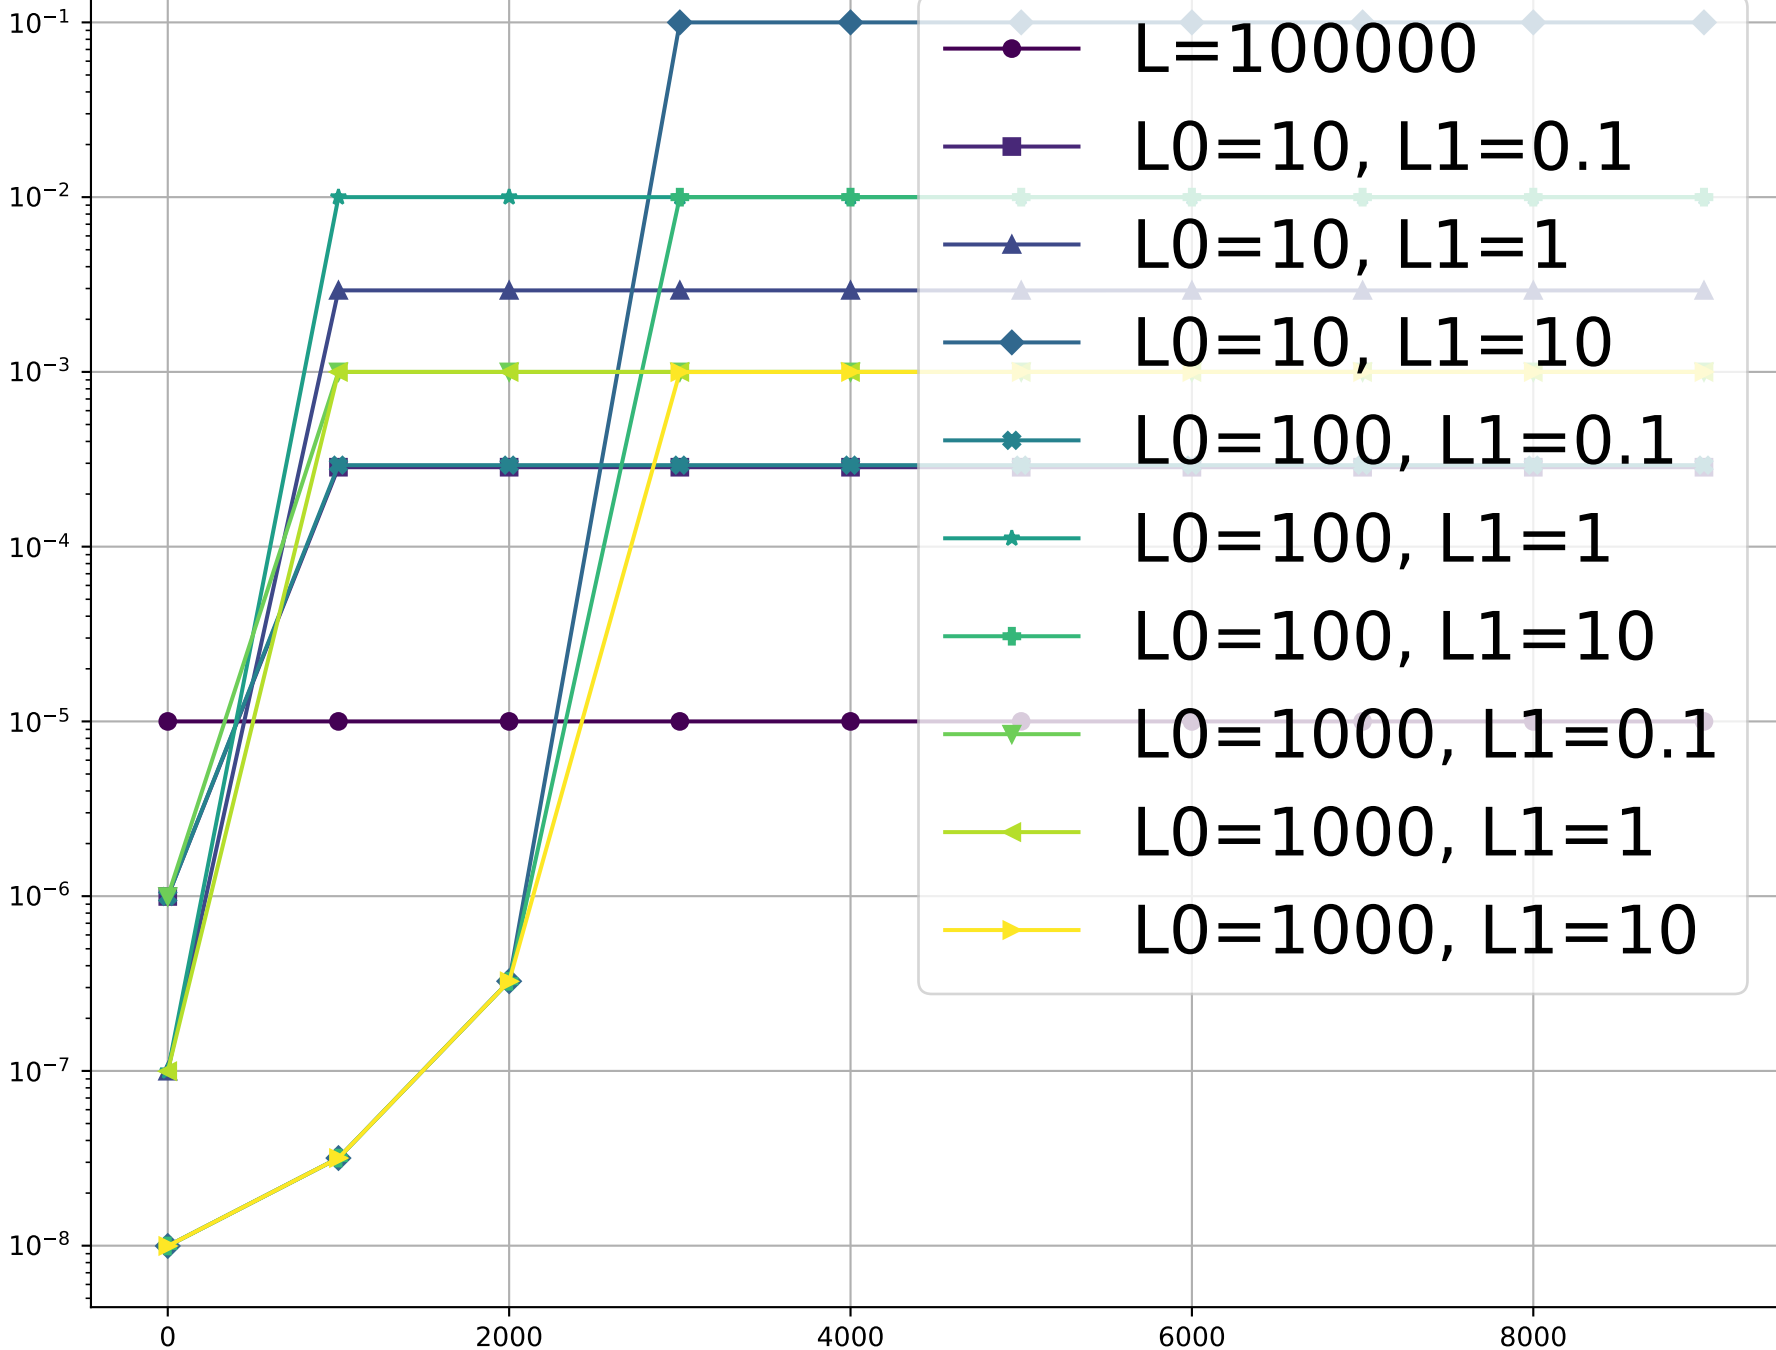

Supplement: supplementary_material [file monotone_cubic_step_size.pdf › L0L1_supplement_neurips25/codes/plots/monotone_cubic_step_size.pdf]
